# Supplementary material for: The pro-regenerative effects of hyperIL6 in drug-induced liver injury are unexpectedly due to competitive inhibition of IL11 signaling
Source: eLife. 2021 Aug 26;10:e68843. doi: 10.7554/eLife.68843 (PMC8445623; doi:10.7554/eLife.68843)
Supplement: Figure 1—figure supplement 1—source data 1. [file elife-68843-fig1-figsupp1-data1.xlsx]

## Sheet: Figure 1-figure supplement 1
Figure 1-figure supplement 1 STAT-independent HyperIL6 activity inhibits APAP- or IL11-stimulated hepatocyte cell death.
Fig. S1A-B
BL	APAP+IgG	APAP+X209	APAP+HyperIL6	APAP+HyperIL6+iSTAT3	APAP+IL6ST Ab
0.469707	42.7103	24.6044	20.3251	24.8629	22.834
0.863643	40.4237	22.6503	21.1126	26.0941	22.1124
0.626376	43.8691	26.5904	24.4611	26.9179	24.55
Fig. S1C	Fluorescence intensity (FC)
BL	APAP+IgG	APAP+X209	APAP+HyperIL6	APAP+HyperIL6+iSTAT3	APAP+IL6ST Ab
0.83409	46.3784	5.51509	7.17775	6.57171	6.57645
1.30519	37.433	4.5287	6.23713	7.31426	5.60347
1.21839	39.6512	5.82679	5.64135	5.32649	7.76721
0.642336	44.4451	5.11975	6.60091	7.38765	7.92346
Fig. S1D
BL	APAP+DMSO	APAP+HyperIL6	APAP+HyperIL6+iSTAT3
174.998	78.9657	124.685	120.719
139.507	101.93	112.368	110.28
152.033	97.7544	104.017	101.93
143.683	81.0534	114.456	114.456
Fig. S1E
BL	IL11	IL11+HyperIL6	IL11+HyperIL6+iSTAT3	IL11+HyperIL6+Sil6st
8.55072	18.7418	13.6627	12.1607	18.9592
10.2569	21.9104	12.0487	17.9776	20.3294
8.4058	21.502	17.3386	12.3452	21.6864
9.61133	18.8669	16.5744	17.8327	19.9144
Fig. S1F	WB quantification		FC: Fold change
	p-ERK/ERK (FC)		p-STAT3/STAT3 (FC)		p-JNK/JNK (FC)		NOX4/GAPDH (FC)
BL	0.928426	1.07157	0.929744	1.07026	0.82892	1.17108	0.831645	1.16836
IL11	2.77843	2.8515	0.940907	1.16869	2.22911	2.34764	2.80647	3.12361
IL11+HyperIL6	1.88976	1.92039	2.89666	2.90495	1.79879	1.64312	1.45568	1.66445
IL11+HyperIL6+iSTAT3	2.09308	2.11688	1.12069	1.10134	1.63888	1.62535	1.60219	1.5073
IL11+HyperIL6+sIL6ST	2.73536	2.71041	1.61146	1.45466	2.11375	1.95834	3.01175	2.64363
Fig. S1G	WB quantification		FC: Fold change
	p-ERK/ERK (FC)		p-STAT3/STAT3 (FC)		p-JNK/JNK (FC)		NOX4/GAPDH (FC)
BL	1		1		1		1
APAP	4.08696		0.81062		5.62852		5.00231
APAP+IgG+DMSO	4.03787		0.880268		5.60924		5.10633
APAP+HyperIL6	1.99982		1.37373		1.58315		3.37106
APAP+HyperIL6+sIL6ST (0.1)	2.10784		1.34163		1.6507		3.24527
APAP+HyperIL6+sIL6ST (0.1)+iSTAT3	1.92286		0.812138		1.59956		3.9114
APAP+HyperIL6+sIL6ST (10)	3.20159		1.07123		3.86884		4.97527
APAP+HyperIL6+sIL6ST (10)+iSTAT3	3.46589		0.849306		4.51812		4.54175
APAP+HyperIL6+sIL6ST (1000)	4.58818		1.0617		6.22416		6.75966
APAP+HyperIL6+sIL6ST (1000)+iSTAT3	4.43317		0.945508		6.16217		6.07153
Fig. S1H
BL	APAP	APAP+IgG+DMSO	APAP+HyperIL6	APAP+HyperIL6+sIL6ST (0.1)	APAP+HyperIL6+sIL6ST (0.1)+iSTAT3	APAP+HyperIL6+sIL6ST (10)	APAP+HyperIL6+sIL6ST (10)+iSTAT3	APAP+HyperIL6+sIL6ST (1000)	APAP+HyperIL6+sIL6ST (1000)+iSTAT3
151.289	99.9001	87.442	107.686	127.931	126.374	103.015	107.687	101.457	79.6559
157.519	93.6713	79.6561	126.374	103.014	123.259	90.557	99.2774	92.1143	84.3282
160.634	81.2135	96.7862	104.572	121.702	103.015	115.472	112.359	78.0987	89.0001
171.534	88.9992	98.3435	124.817	117.03	113.916	106.13	93.6714	87.4426	104.572
