# Supplementary material for: The pro-regenerative effects of hyperIL6 in drug-induced liver injury are unexpectedly due to competitive inhibition of IL11 signaling
Source: eLife. 2021 Aug 26;10:e68843. doi: 10.7554/eLife.68843 (PMC8445623; doi:10.7554/eLife.68843)
Supplement: Figure 1—source data 1. [file elife-68843-fig1-data1.xlsx]

## Sheet: Figure 1
Figure 1. STAT-independent HyperIL6 activity inhibits APAP- or IL11-stimulated cell death through competitive binding to the shared IL6ST co-receptor.
Fig. 1A-B
BL	APAP+IgG	APAP+X209	APAP+HyperIL6	APAP+HyperIL6+iSTAT3	APAP+IL6ST Ab
0.469707	42.7103	24.6044	20.3251	24.8629	22.834
0.863643	40.4237	22.6503	21.1126	26.0941	22.1124
0.626376	43.8691	26.5904	24.4611	26.9179	24.55
Fig. 1C	WB quantification		FC: Fold change
	p-ERK/ERK (FC)		p-STAT3/STAT3 (FC)		p-JNK/JNK (FC)		NOX4/GAPDH (FC)
BL	0.79419	1.20581	0.995653	1.00435	1.03037	0.969631	0.871684	1.12832
APAP+IgG	8.02127	8.6936	0.63899	0.548257	3.46036	3.31618	6.78566	6.46574
APAP+X209	3.33873	2.65174	0.603317	0.688424	1.41676	1.43262	1.83849	2.08667
APAP+HyperIL6	4.8414	4.94356	1.15507	1.16244	2.16507	2.20056	3.60042	3.29953
APAP+IL6ST Ab	4.21234	3.41992	0.65668	0.526363	1.61877	1.26564	2.36093	1.90256
Fig. 1D	WB quantification		FC: Fold change
	p-ERK/ERK (FC)		p-AKT/AKT (FC)		p-STAT3/STAT3 (FC)
BL	1		1		1
5 min	1.3429		1.082		17.3571
15 min	1.39889		0.764246		20.2245
2 h	0.385707		0.492755		9.61049
6 h	1.06539		0.859943		11.1841
24 h	0.900696		0.892577		5.99967
Fig. 1E
BL	APAP+IgG	APAP+X209	APAP+HyperIL6	APAP+IL6ST Ab
131.157	85.2286	131.157	116.543	124.894
170.822	104.017	143.683	106.105	118.631
156.209	81.0533	129.069	108.193	114.456
168.735	91.4915	126.982	124.894	137.42
Fig. 1F	Fluorescence intensity (FC)			FC: Fold change
BL	APAP+IgG	APAP+X209	APAP+HyperIL6	APAP+HyperIL6+iSTAT3	APAP+IL6ST Ab
0.83409	46.3784	5.51509	7.17775	6.57171	6.57645
1.30519	37.433	4.5287	6.23713	7.31426	5.60347
1.21839	39.6512	5.82679	5.64135	5.32649	7.76721
0.642336	44.4451	5.11975	6.60091	7.38765	7.92346
Fig. 1G	WB quantification		FC: Fold change
	p-ERK/ERK (FC)		p-STAT3/STAT3 (FC)		p-JNK/JNK (FC)		NOX4/GAPDH (FC)
BL	0.980002	1.02	0.975903	1.0241	0.942986	1.05701	0.859566	1.14043
APAP+DMSO	4.1559	4.23274	0.645547	0.696755	3.49663	3.23934	5.232	5.4035
APAP+HyperIL6	2.33882	2.44107	1.12136	1.19992	1.24055	1.20855	2.79812	2.73866
APAP+HyperIL6+iSTAT3	2.15233	1.81722	0.731812	0.649738	1.24524	1.03243	2.60684	2.40176
Fig. 1I
		HyperIL6 dose-response					HyperIL6+sIL6ST (dose-response)
BL	IL11	1.25	2.5	5	10	20	0.1	1	10	100	1000
9.40818	21.51	18.5638	18.5768	18.0782	16.453	14.2126	16.4336	17.6897	17.6185	17.5473	17.8322
10.1593	21.9956	18.3631	18.1171	17.0811	16.1292	14.3745	16.6408	17.4437	16.7185	17.871	21.6913
9.29163	18.2854	19.7811	17.4955	15.6889	15.0285	15.922	14.776	16.6926	18.5897	20.4416	21.3805
10.1075	19.4768	19.2955	16.8415	15.6695	14.763	16.0321	15.6825	15.404	18.7905	20.3704	20.733
Fig. 1J	WB quantification		FC: Fold change
				HyperIL6 dose-response					HyperIL6+sIL6ST (dose-response)
		BL	IL11	1.25	2.5	5	10	20	0.1	1	10	100	1000
p-ERK/ERK (FC)		1	2.51603	2.58097	2.39647	2.04471	1.65018	1.18426	1.26843	1.69713	1.93266	2.13741	2.27525
p-STAT3/STAT3 (FC)		1	1.05313	0.822729	0.607738	0.727367	0.734412	0.844632	1.04459	0.846639	0.832408	0.757134	0.643929
p-JNK/JNK (FC)		1	2.01364	2.18717	1.94355	1.56442	1.02133	0.813979	0.818024	1.16018	1.44734	1.69843	1.87548
NOX4/GAPDH (FC)		1	2.09928	1.92583	2.03183	1.77857	1.37434	0.996663	1.00143	1.1269	1.48048	1.69949	1.92645
