# Supplementary material for: The pro-regenerative effects of hyperIL6 in drug-induced liver injury are unexpectedly due to competitive inhibition of IL11 signaling
Source: eLife. 2021 Aug 26;10:e68843. doi: 10.7554/eLife.68843 (PMC8445623; doi:10.7554/eLife.68843)
Supplement: Figure 2—figure supplement 1—source data 1. [file elife-68843-fig2-figsupp1-data1.xlsx]

## Sheet: Figure 3
Figure 2-figure supplement 1 Hepatocyte-specific HyperIl6 expression promotes liver regeneration following APAP-induced liver injury and phenocopies inhibition of IL11 signaling.
Number of Ki67+ve cells
Saline	APAP+AAV8-Alb-Null+IgG	APAP+AAV8-Alb-HyperIl6	APAP+X209	APAP+AAV8-Alb-sIl6st
10	16	268	194	11
23	9	125	202	5
15	6	198	178	6
11	17	164	133	15
15	11	183	159	8
17	12	216	226	13
