# Supplementary material for: The pro-regenerative effects of hyperIL6 in drug-induced liver injury are unexpectedly due to competitive inhibition of IL11 signaling
Source: eLife. 2021 Aug 26;10:e68843. doi: 10.7554/eLife.68843 (PMC8445623; doi:10.7554/eLife.68843)
Supplement: Figure 2—source data 1. [file elife-68843-fig2-data1.xlsx]

## Sheet: Figure 2
Figure 2. Hepatocyte-specific HyperIl6 expression reduces APAP-induced liver injury and phenocopies the effects seen with inhibition of IL11 signaling.
Fig. 2B
Saline	APAP 6h	APAP+rhHyperIL6	APAP+rmHyperIL6
53.5585	4541.88	1572.26	3591.14
57.3106	4886.83	3082.18	3217.14
47.6277	4093.44	2071.53	3412.01
37.7633	7314.21	1819.78	1983.78
69.2931	6991.65	2418.3	2637.38
Fig. 2C
Saline	APAP 6h	APAP+rhHyperIL6	APAP+rmHyperIL6
70.7207	537.297	363.063	483.153
108.378	658.919	289.099	271.441
58.4685	760.36	513.514	436.847
61.3514	554.775	377.297	394.054
56.1261	462.252	471.441	294.775
Fig. 2D
Saline	APAP 6h	APAP+rhHyperIL6	APAP+rmHyperIL6
1.97966	1.32905	1.72794	2.23296
2.22623	1.55389	2.05767	1.68729
2.13425	1.68687	2.15826	1.8633
2.43349	1.478	1.98046	2.17702
2.69891	1.61989	2.30891	1.76544
Fig. 2E	WB quantification		FC: Fold change
	p-ERK/ERK (FC)			p-STAT3/STAT3 (FC)			p-JNK/JNK (FC)
Saline	1.10757	0.859071	1.03336	1.10158	0.752855	1.14557	0.909894	1.10547	0.98464
APAP 6h	3.41651	3.3923	3.41466	2.09927	2.80386	3.23425	3.13726	3.50385	3.44732
APAP+rhHyperIL6	1.78656	1.74798	1.59073	6.73229	7.21845	5.0606	1.52071	1.49127	1.57534
APAP+rmHyperIL6	1.9031	1.97161	1.59702	5.80195	6.18393	5.53779	1.76002	1.56812	1.55468
Fig. 2F	Necrotic area (%)		0=Not detectable
Saline	APAP 6h	APAP+rhHyperIL6	APAP+rmHyperIL6
0	57.2101	17.3989	28.2012
0	47.7544	12.6808	25.8684
0	59.2559	20.544	29.0338
0	62.636	16.4869	21.0117
0	67.9235	13.4074	24.4247
Fig. 2H	WB quantification		FC: Fold change
	HyperIL6/GAPDH (FC)
Saline	1.03101	0.968988
APAP+AAV8-Alb-Null+IgG	1.04585	1.10791
APAP+AAV8-Alb-HyperIl6	44.175	43.322
Fig. 2I
Saline	APAP+AAV8-Alb-Null+IgG	APAP+AAV8-Alb-HyperIl6	APAP+X209	APAP+AAV8-Alb-sIl6st
33.0698	11973.6	4366.27	1598.81	9666.01
82.0158	9971.67	7460.47	3490.12	12764.2
70.1581	11487.5	6727.93	6479.58	8102.11
85.112	10157.4	8103.43	1565.88	10593.5
54.9407	12558.6	5749.67	5949.27	10644.3
89.7892	7283.27	5086.3	5157.44	12107.4
Fig. 2J
Saline	APAP+AAV8-Alb-Null+IgG	APAP+AAV8-Alb-HyperIl6	APAP+X209	APAP+AAV8-Alb-sIl6st
98.8613	998.24	752.588	126.087	1150.41
27.3292	873.292	450.828	224.741	1260.87
36.646	1257.35	699.482	486.749	783.54
69.5652	1105.07	705.176	171.946	1012.63
58.2816	1038.72	508.385	382.195	702.07
95.7557	691.304	183.333	543.789	1030.64
Fig. 2K	WB quantification		FC: Fold change
	sIL6ST/GAPDH (FC)		PCNA/GAPDH (FC)		Cyclin D1/GAPDH (FC)
Saline	1.02854	0.971459	0.923175	1.07683	0.974971	1.02503
APAP+AAV8-Alb-Null+IgG	1.02695	0.912154	0.358423	0.387041	0.338008	0.361948
APAP+AAV8-Alb-HyperIl6	0.962327	1.03696	3.51394	3.63671	0.847067	0.999345
APAP+X209	1.03906	0.969983	3.58185	3.21776	1.28244	1.34096
APAP+AAV8-Alb-sIl6st	74.8084	76.9963	0.273128	0.207227	0.528427	0.362137
Fig. 2L	WB quantification		FC: Fold change
	p-ERK/ERK (FC)		p-STAT3/STAT3 (FC)		p-JNK/JNK (FC)
Saline	0.845308	1.15469	0.912665	1.08733	0.955666	1.04433
APAP+AAV8-Alb-Null+IgG	2.30253	2.03733	1.23903	1.17857	2.20969	2.09555
APAP+AAV8-Alb-HyperIl6	1.39223	1.46189	4.29369	3.92125	1.11387	1.09982
APAP+X209	0.664278	0.857865	1.19162	1.24899	0.887697	0.872117
APAP+AAV8-Alb-sIl6st	1.93471	2.10789	1.104	0.919489	2.15683	2.11427
Fig. 2M
Saline	APAP+AAV8-Alb-Null+IgG	APAP+AAV8-Alb-HyperIl6	APAP+X209	APAP+AAV8-Alb-sIl6st
2.4044	0.552862	1.27547	1.91151	0.68733
2.23196	1.1318	1.47456	1.62886	0.540161
2.00088	0.539911	1.36961	1.45208	1.1298
2.50861	0.825419	1.10757	1.98078	0.839208
2.65793	1.03844	1.51626	1.75527	0.939396
2.4821	0.758992	1.75785	1.53998	0.754173
Fig. 2N	Necrotic area (%)		0=Not detectable
Saline	APAP+AAV8-Alb-Null+IgG	APAP+AAV8-Alb-HyperIl6	APAP+X209	APAP+AAV8-Alb-sIl6st
0	57.6937	19.7596	19.1606	69.2093
0	46.2327	29.8232	13.3782	45.7208
0	48.9807	28.3977	17.0874	66.8123
0	58.141	22.0233	14.5419	51.05
0	52.5978	18.1856	24.4048	47.2211
0	66.7675	24.8599	20.1787	54.5935
