# Supplementary material for: The pro-regenerative effects of hyperIL6 in drug-induced liver injury are unexpectedly due to competitive inhibition of IL11 signaling
Source: eLife. 2021 Aug 26;10:e68843. doi: 10.7554/eLife.68843 (PMC8445623; doi:10.7554/eLife.68843)
Supplement: Figure 3—figure supplement 1—source data 1. [file elife-68843-fig3-figsupp1-data1.xlsx]

## Sheet: Figure 3-figure supplement 1
Figure 3-figure supplement 1 Hepatocyte-specific HyperIl6 expression reduces APAP- or IL11-induced liver injury independent of STAT3 activation.
Fig. S3A
Saline	APAP+AAV8-Alb-Null	APAP+AAV8-Alb-HyperIl6	APAP+AAV8-Alb-HyperIl6+iSTAT3
88.0579	384.399	131.584	351.628
95.9992	433.655	142.642	320.567
61.0172	497.487	282.871	265.279
84.8411	343.185	330.016	238.842
54.5838	579.212	240.149	164.857
Fig. S3B
Saline	APAP+AAV8-Alb-Null	APAP+AAV8-Alb-Null+DMSO	APAP+X209	APAP+AAV8-Alb-HyperIl6	APAP+AAV8-Alb-HyperIl6+iSTAT3
69.9105	550.096	447.347	243.528	188.798	190.157
103.627	503.835	364.174	162.432	253.356	224.033
55.3691	306.648	562.64	117.53	172.499	122.803
74.3049	402.844	606.424	149.968	107.622	158.997
52.4129	608.741	372.803	133.989	162.672	200.384
Fig. S3C
Saline	IL11+AAV8-Alb-Null	IL11+AAV8-Alb-HyperIl6	IL11+AAV8-Alb-HyperIl6+iSTAT3
48.4914	129.259	42.6416	59.1646
38.7418	63.0644	55.47	69.1195
66.759	67.2721	37.305	66.0406
57.6252	112.428	76.5086	31.9684
35.7656	100.421	69.3247	40.5891
