# Supplementary material for: The pro-regenerative effects of hyperIL6 in drug-induced liver injury are unexpectedly due to competitive inhibition of IL11 signaling
Source: eLife. 2021 Aug 26;10:e68843. doi: 10.7554/eLife.68843 (PMC8445623; doi:10.7554/eLife.68843)
Supplement: Figure 3—source data 1. [file elife-68843-fig3-data1.xlsx]

## Sheet: Figure 3
Figure 3. Hepatocyte-specific HyperIl6 expression reduces APAP- or IL11-induced liver injury independent of STAT3 activation.
Fig. 3B
Saline	APAP+AAV8-Alb-Null	APAP+AAV8-Alb-HyperIl6	APAP+AAV8-Alb-HyperIl6+iSTAT3
54.4843	4594.17	2712.26	1887.89
60.7623	5806.43	3259.34	3961.14
65.2466	6752.62	1943.95	2746.64
73.0942	4840.06	3189.09	3669.66
80.3438	3772.05	1695.07	2665.92
Fig. 3C
Saline	APAP+AAV8-Alb-Null	APAP+AAV8-Alb-HyperIl6	APAP+AAV8-Alb-HyperIl6+iSTAT3
2.05855	1.45027	1.69536	1.79616
2.19923	1.35275	2.24873	1.68383
1.92865	1.54889	2.29075	2.31689
2.39909	1.60862	1.79163	1.92329
2.57927	1.67156	1.97901	1.89415
Fig. 3D	WB quantification		FC: Fold change
	p-ERK/ERK (FC)			p-STAT3/STAT3 (FC)			p-JNK/JNK (FC)
Saline	0.962151	0.949724	1.08812	1.01798	0.739519	1.2425	1.13164	1.03456	0.833804
APAP+AAV8-Alb-Null	4.95608	5.78298	7.26479	3.57881	3.82678	3.04809	3.71262	4.39907	3.74572
APAP+AAV8-Alb-HyperIl6	2.79547	2.70134	2.41991	6.28222	5.91082	6.23489	1.61425	1.93197	1.94123
APAP+AAV8-Alb-HyperIl6+iSTAT3	2.43874	2.29864	1.94482	1.09694	0.974483	0.836856	1.6941	1.71353	1.42658
Fig. 3E	Necrotic area (%)		0=Not detectable
Saline	APAP+AAV8-Alb-Null	APAP+AAV8-Alb-HyperIl6	APAP+AAV8-Alb-HyperIl6+iSTAT3
0	52.7682	18.7589	18.2184
0	53.3306	13.1898	21.4841
0	43.3924	20.2718	13.7319
0	58.3004	19.0305	18.7831
0	53.2854	12.9986	15.8884
Fig. 3G
Saline	APAP+AAV8-Null	APAP+AAV8-Null+DMSO	APAP+X209	APAP+AAV8-HyperIL6	APAP+AAV8-HyperIL6+iSTAT3
105.562	5929.38	3571.17	753.75	818.697	929.382
73.7285	3829.13	5317.42	508.598	993.414	739.115
71.5331	3559.28	4768.57	472.009	571.716	536.956
59.9158	5869.92	5675.08	585.437	818.697	743.688
97.9692	4922.25	4465.79	984.266	691.548	973.289
Fig. 3H
Saline	APAP+AAV8-Alb-Null	APAP+AAV8-Alb-Null+DMSO	APAP+X209	APAP+AAV8-Alb-HyperIl6	APAP+AAV8-Alb-HyperIl6+iSTAT3
2.42096	1.27224	1.38948	2.19427	2.08373	2.01194
2.59831	1.34582	1.24781	2.04736	2.13154	2.10924
2.11368	1.6436	1.70567	2.10718	2.42466	2.39725
2.31761	1.45654	1.33501	2.40863	2.2416	2.19124
2.58996	1.39277	1.55484	2.31662	2.07128	2.20017
Fig. 3I	WB quantification		FC: Fold change
	p-ERK/ERK (FC)		p-STAT3/STAT3 (FC)		p-JNK/JNK (FC)		PCNA/GAPDH (FC)		Cyclin D1/GAPDH (FC)
Saline	0.964035	1.03597	0.845681	1.15432	1.0204	0.979601	0.830154	1.16985	0.950431	1.04957
APAP+AAV8-Alb-Null	7.22337	8.10875	1.13637	0.874341	2.55403	2.91806	7.84865	7.53519	2.16749	2.58365
APAP+AAV8-Alb-Null+DMSO	8.43525	9.00339	0.890627	0.95488	2.91257	3.29767	8.44	10.897	2.51718	2.95322
APAP+X209	1.33259	1.26207	1.40271	1.89633	1.3253	1.28002	23.0316	22.1394	14.7985	15.3422
APAP+AAV8-Alb-HyperIl6	1.17807	0.922471	5.27222	4.82095	1.37356	1.54131	22.7831	19.4795	17.9138	17.5246
APAP+AAV8-Alb-HyperIl6+iSTAT3	0.990189	0.918622	1.19308	0.966181	1.60145	1.8074	19.9828	17.0001	16.7776	12.8461
Fig. 3J	Necrotic area (%)		0=Not detectable
Saline	APAP+AAV8-Alb-Null	APAP+AAV8-Alb-Null+DMSO	APAP+X209	APAP+AAV8-Alb-HyperIl6	APAP+AAV8-Alb-HyperIl6+iSTAT3
0	34.5218	35.9583	6.58963	10.7676	16.8931
0	30.6828	44.7433	13.4854	13.1499	14.783
0	39.8352	33.71	8.3641	14.4783	10.6632
0	40.5245	37.7907	11.4951	9.25939	10.577
0	42.9839	42.2398	10.5131	7.94053	12.688
Fig. 3K	Number of Ki67+ve cells
Saline	APAP+AAV8-Alb-Null	APAP+AAV8-Alb-Null+DMSO	APAP+X209	APAP+AAV8-Alb-HyperIl6	APAP+AAV8-Alb-HyperIl6+iSTAT3
54	74	78	769	431	391
41	82	47	604	472	511
48	49	57	524	536	482
36	67	62	597	576	446
46	86	54	671	504	552
Fig. 3M
Saline	IL11+AAV8-Alb-Null	IL11+AAV8-Alb-HyperIl6	IL11+AAV8-Alb-HyperIl6+iSTAT3
38.3917	126.07	77.1725	60.0519
37.3541	106.68	69.585	45.9144
55.3178	154.28	51.3619	65.3696
34.5007	96.4981	59.9222	78.5992
48.1842	156.031	85.3437	66.6667
Fig. 3N	WB quantification		FC: Fold change
	p-ERK/ERK (FC)			p-STAT3/STAT3 (FC)			p-JNK/JNK (FC)
Saline	0.948924	0.991222	1.05985	0.91325	0.929263	1.15749	0.908431	0.993837	1.09773
IL11+AAV8-Alb-Null	2.4486	2.3097	2.47507	3.6859	3.84479	3.16069	2.75212	2.70507	2.24873
IL11+AAV8-Alb-HyperIl6	1.3053	1.21685	1.20725	6.19096	5.79183	6.07281	1.39983	1.55519	1.38631
IL11+AAV8-Alb-HyperIl6+iSTAT3	1.23087	1.18561	1.24808	1.4014	1.3989	1.36275	1.39164	1.31393	0.794438
