# Supplementary material for: The pro-regenerative effects of hyperIL6 in drug-induced liver injury are unexpectedly due to competitive inhibition of IL11 signaling
Source: eLife. 2021 Aug 26;10:e68843. doi: 10.7554/eLife.68843 (PMC8445623; doi:10.7554/eLife.68843)
Supplement: Figure 4—figure supplement 1—source data 1. [file elife-68843-fig4-figsupp1-data1.xlsx]

## Sheet: Figure 3
Figure 4-figure supplement 1 Hepatocyte-specific HyperIl6 expression has no effect on hepatocyte regeneration in Il11-/- mice.
Number of Ki67+ve cells
	Saline AAV8-Alb-Null				APAP AAV8-Alb-Null						APAP AAV8-Alb-HyperIl6
Il11+/+	18	20	15	10	16	11	8	12	10	16	118	86	65	103	72	67
Il11-/-	8	12	17	11	144	78	132	96	74	89	71	80	103	124	75	118
