# Supplementary material for: The pro-regenerative effects of hyperIL6 in drug-induced liver injury are unexpectedly due to competitive inhibition of IL11 signaling
Source: eLife. 2021 Aug 26;10:e68843. doi: 10.7554/eLife.68843 (PMC8445623; doi:10.7554/eLife.68843)
Supplement: Figure 4—source data 1. [file elife-68843-fig4-data1.xlsx]

## Sheet: Figure 4
Figure 4. Il11-/- mice exhibit spontaneous liver regeneration following APAP injury and HyperIL6 has no beneficial effect in this strain.
Fig. 4B	WB quantification		FC: Fold change
IL11/GAPDH (FC)		Saline AAV8-Alb-Null		APAP AAV8-Alb-Null		APAP AAV8-Alb-HyperIl6
Il11+/+		1.00621	0.993793	1.79157	1.57977	1.67112	1.55441
Il11-/-		0.0853424	0.0715154	0.0347621	0.0491328	0.0741975	0.0729054
PCNA/GAPDH (FC)		Saline AAV8-Alb-Null		APAP AAV8-Alb-Null		APAP AAV8-Alb-HyperIl6
Il11+/+		0.834962	1.16504	0.215666	0.269797	2.91041	2.92682
Il11-/-		1.3482	1.23506	2.82431	2.88591	2.98552	3.14624
Cyclin D1/GAPDH (FC)		Saline AAV8-Alb-Null		APAP AAV8-Alb-Null		APAP AAV8-Alb-HyperIl6
Il11+/+		1.12964	0.870361	0.0932755	0.100552	4.66087	4.45136
Il11-/-		1.29151	1.54662	6.77342	6.66191	6.26006	6.65558
Fig. 4C
	Saline AAV8-Alb-Null				APAP AAV8-Alb-Null						APAP AAV8-Alb-HyperIl6
Il11+/+	48.7354	54.3126	74.9351	61.8353	4977.63	10085.3	11295.4	10586.6	7603.44	12437.4	6635.21	1960.77	3441.96	7124.84	4008.76	4337.55
Il11-/-	67.0233	66.9585	42.9637	56.3229	7002.27	5199.42	1912.78	7771.4	2297.34	3665.69	5357.65	7068.42	4975.03	2192.93	6158.56	4012
Fig. 4D
	Saline AAV8-Alb-Null				APAP AAV8-Alb-Null						APAP AAV8-Alb-HyperIl6
Il11+/+	57.8305	30.429	75.2771	50.9545	871.972	1198.53	1332.87	1043.15	1559.88	1699.97	679.136	406.558	1085.13	906.558	640.24	505.49
Il11-/-	68.8116	22.9372	58.1383	45.5152	985.376	445.967	591.8	646.192	395.679	1028.89	672.055	809.678	535.355	450.38	1094.37	611.812
Fig. 4E
	Saline AAV8-Alb-Null				APAP AAV8-Alb-Null						APAP AAV8-Alb-HyperIl6
Il11+/+	2.5409	2.99897	2.45021	2.34527	0.911704	1.10025	1.3712	0.844729	1.27964	1.44878	1.87685	1.24235	2.22742	1.35567	2.15947	1.60942
Il11-/-	2.29278	2.85726	2.56024	2.15801	1.75604	2.16512	1.95486	1.79525	1.65626	1.52099	1.5786	1.53408	1.71311	2.33929	2.03849	1.92861
Fig. 4F	Necrotic area (%)		0=Not detectable
	Saline AAV8-Alb-Null				APAP AAV8-Alb-Null						APAP AAV8-Alb-HyperIl6
Il11+/+	0	0	0	0	51.1186	64.229	55.9235	68.4202	57.7782	66.9786	26.1724	36.9465	32.8768	21.3209	29.8707	27.7941
Il11-/-	0	0	0	0	18.9023	27.8412	23.2495	32.0201	26.8874	17.1684	35.6903	31.1122	19.7636	17.6742	32.0404	22.1631
Fig. 4G	WB quantification		FC: Fold change
p-ERK/ERK (FC)		Saline AAV8-Alb-Null		APAP AAV8-Alb-Null		APAP AAV8-Alb-HyperIl6
Il11+/+		0.892384	1.10762	7.73784	8.60392	4.63732	3.4199
Il11-/-		1.13748	1.16748	3.36346	4.2463	3.96889	3.52807
p-STAT3/STAT3 (FC)		Saline AAV8-Alb-Null		APAP AAV8-Alb-Null		APAP AAV8-Alb-HyperIl6
Il11+/+		0.960106	1.03989	2.04863	2.43059	12.1422	13.5835
Il11-/-		1.10614	1.01384	2.7168	2.55214	11.9605	10.5827
p-JNK/JNK (FC)		Saline AAV8-Alb-Null		APAP AAV8-Alb-Null		APAP AAV8-Alb-HyperIl6
Il11+/+		1.00547	0.994532	2.54094	3.08479	1.78184	1.67085
Il11-/-		1.19169	1.12263	1.33677	1.47252	1.33713	1.20795
